# Supplementary material for: Bortezomib Augments Natural Killer Cell Targeting of Stem-Like Tumor Cells
Source: MDPI journal article supplement (doi:10.3390/cancers11010085), 2019-01-14
Supplement: s1 [file s1]

# Bortezomib Augments Natural Killer Cell Targeting of Stem-Like Tumor Cells

Jesus I. Luna, Steven K. Grossenbacher, Ian R. Sturgill, Erik Ames, Sean J. Judge, Lyes A. Bouzid, Morgan A. Darrow, William J. Murphy and Robert J. Canter

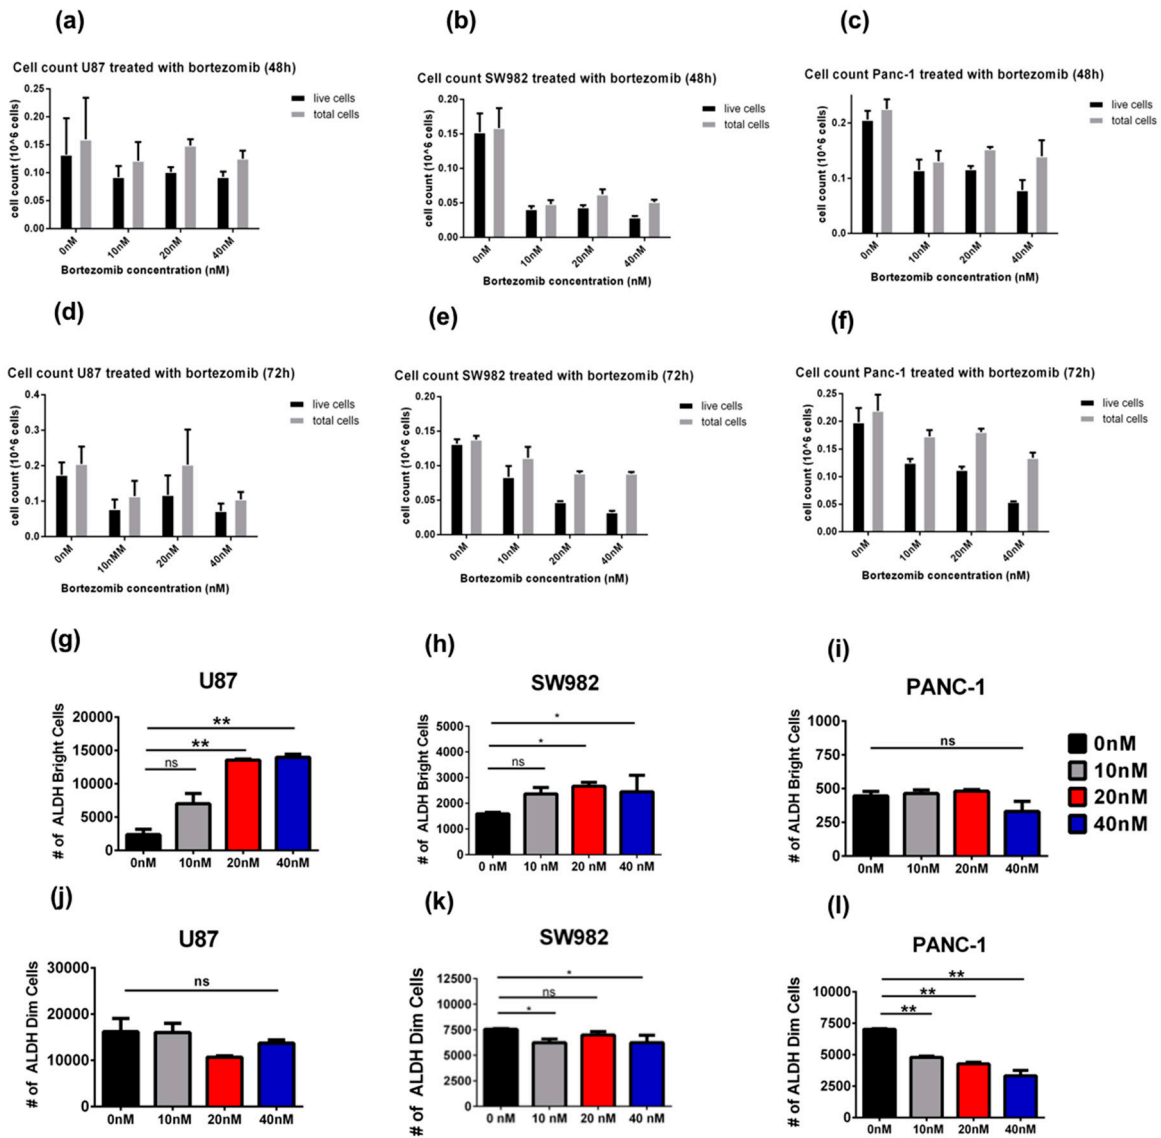

**Figure S1.** Cell counts and number of ALDH<sup>bright</sup> and ALDH<sup>dim</sup> from bortezomib treated cells. Cell counts indicating total cell numbers and total live cells in U87 (a,d), SW982 (b,e), and PANC-1 (c,f) after 48 and 72 h, respectively. Numbers of ALDH<sup>bright</sup> and ALDH<sup>dim</sup> cells in U87 (g,j), SW982 (h,k), and PANC-1 (i,l) cells treated with 0, 10, 20, and 40 nM bortezomib for 48 h. Cell numbers were calculated by flow cytometry based on aldefluor assay. (\* =  $p < 0.05$ , \*\* =  $p < 0.01$ ).

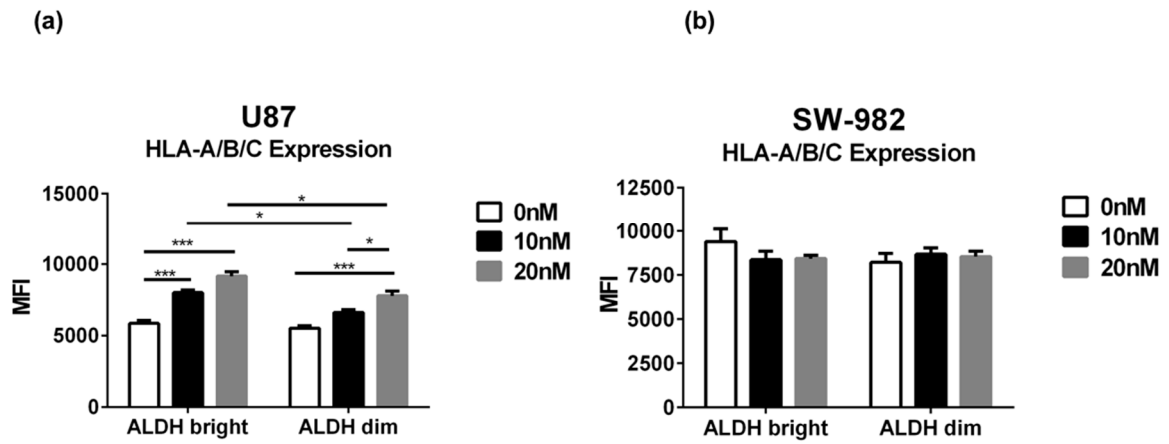

**Figure S2.** HLA-ABC expression in ALDH<sup>bright</sup> and ALDH<sup>dim</sup> cells treated with bortezomib. Bar graphs showing expression levels of HLA-ABC in U87 (a) and SW982 (b) treated with 0, 10, and 20 nM bortezomib for 48 h. (\* =  $p < 0.05$ , \*\* =  $p < 0.01$ , \*\*\* =  $p < 0.001$ ).



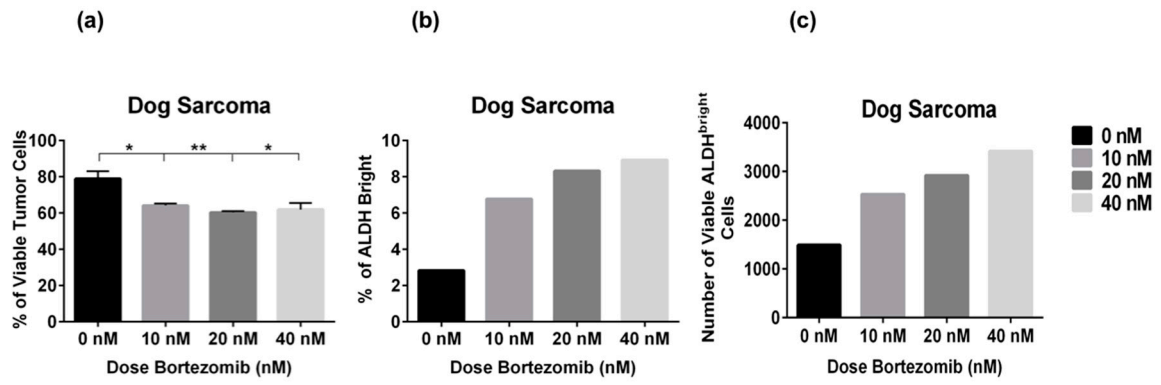

**Figure S4.** Bortezomib increases ALDH<sup>bright</sup> cells by frequency and numbers and decreases the frequency of viable cells in dog sarcoma. (a) % of viable tumor cells, (b) % of ALDH<sup>bright</sup> cells, and (c) number of ALDH<sup>bright</sup> cells in dog sarcoma treated with bortezomib for 24 h. (\* =  $p < 0.05$ , \*\* =  $p < 0.01$ ).
